# Supplementary material for: Characterizing the spatiotemporal nitrogen stable isotopic composition of ammonia in vehicle plumes
Source: Copernicus journal article supplement (doi:10.5194/acp-20-11551-2020), 2020-10-09
Supplement: Supplementary file 1 [file acp-20-11551-2020-supplement.pdf]

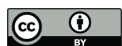

*Supplement of*

## **Characterizing the spatiotemporal nitrogen stable isotopic composition of ammonia in vehicle plumes**

**Wendell W. Walters et al.**

*Correspondence to:* Wendell W. Walters ([wendell\\_walters@brown.edu](mailto:wendell_walters@brown.edu))

The copyright of individual parts of the supplement might differ from the CC BY 4.0 License.

## **Section S1. Denuder and Filter Preparation, Extraction, and Handling Protocol**

All denuders and filters were cleaned and coated fresh daily. Denuder and filter coating solutions were produced using ACS certified reagents, and all water used for cleaning, coating, and extraction was of ultra-high purity grade ( $>18.2\text{ M}\Omega$ ). Denuders were coated using 10 mL of the appropriate solution and air-dried for at least 1 h. PTFE and Nylon filters were rinsed and sonicated with 20 mL of water for 30 minutes three times and dried in an oven at  $50\text{ }^{\circ}\text{C}$  for at least thirty minutes. The cellulose filters were not rinsed before use due to disintegration issues and were directly impregnated with a 0.5 mL of the 5 % citric acid (w/v) solution and dried with ultra-high purity nitrogen ( $>99.9\%$ ). The denuder-filter packs were loaded, and the inlet and outlet were capped and transported to the field site. Immediately after collection, the cartridges were capped and transported back to the laboratory for extraction. Periodically, field blanks were taken for all sample types (i.e., filters and denuders), representing approximately 10 % of the total number of collected samples. Replicate samples (e.g., side-by-side samples) were periodically conducted at the near-highway site during summer to determine measurement precision. The ALPHA samplers were prepared in the laboratory, capped, and then transported to the field site. After collection, the passive samplers were immediately capped and transported back to the laboratory for extraction.

Collections on the denuders and filters were extracted using water. The PTFE filters were pre-wetted with 500  $\mu\text{L}$  of ethanol to wet its hydrophobic surface before extraction. All filter samples were sonicated for 1 h. Filters were then removed using cleaned forceps, and the extraction solutions were then passed through a  $0.22\text{ }\mu\text{m}$  syringe filter to remove loose filter pieces and potential microbial contaminants. After extraction, all solutions were placed in a freezer at  $-30\text{ }^{\circ}\text{C}$  until subsequent concentration and isotopic analysis.

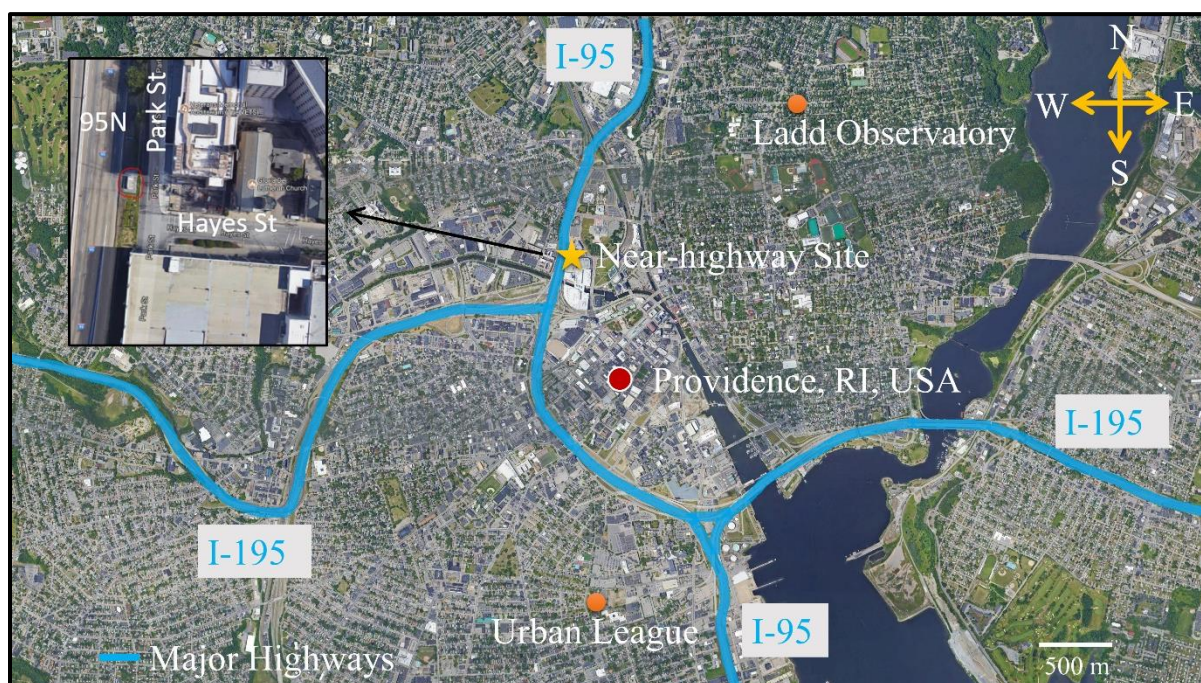

**Figure S1:** Google Earth image of Providence, RI, US with the locations of the near-highway stationary monitoring site (star), meteorological data monitoring locations (circles), and major interstate highway routes (turquoise). Copyright © 2020 Google.

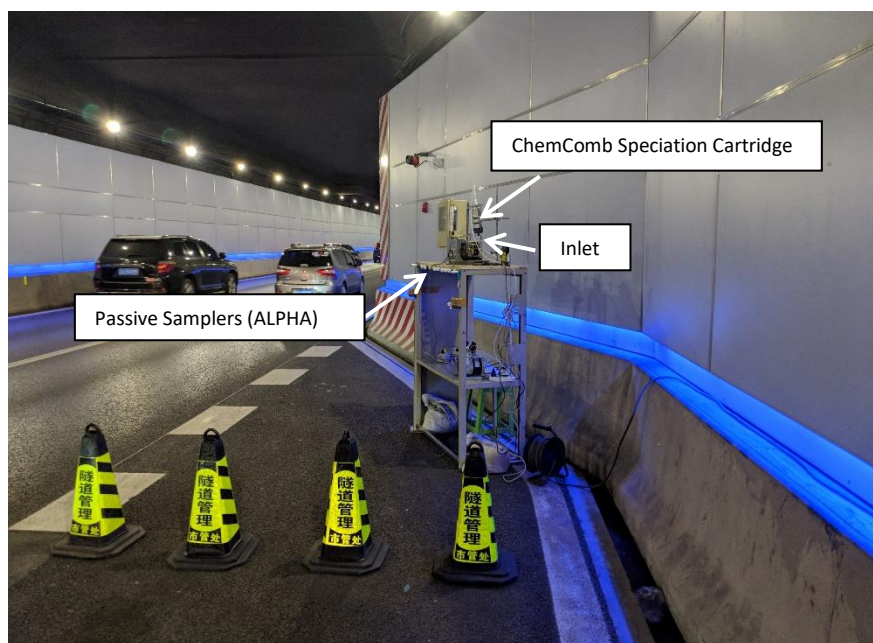

**Figure S2:** Image of the sampling set-up for collection of  $\text{NH}_3$  from fresh vehicle traffic plumes in a tunnel at Shenyang, Liaoning, China.

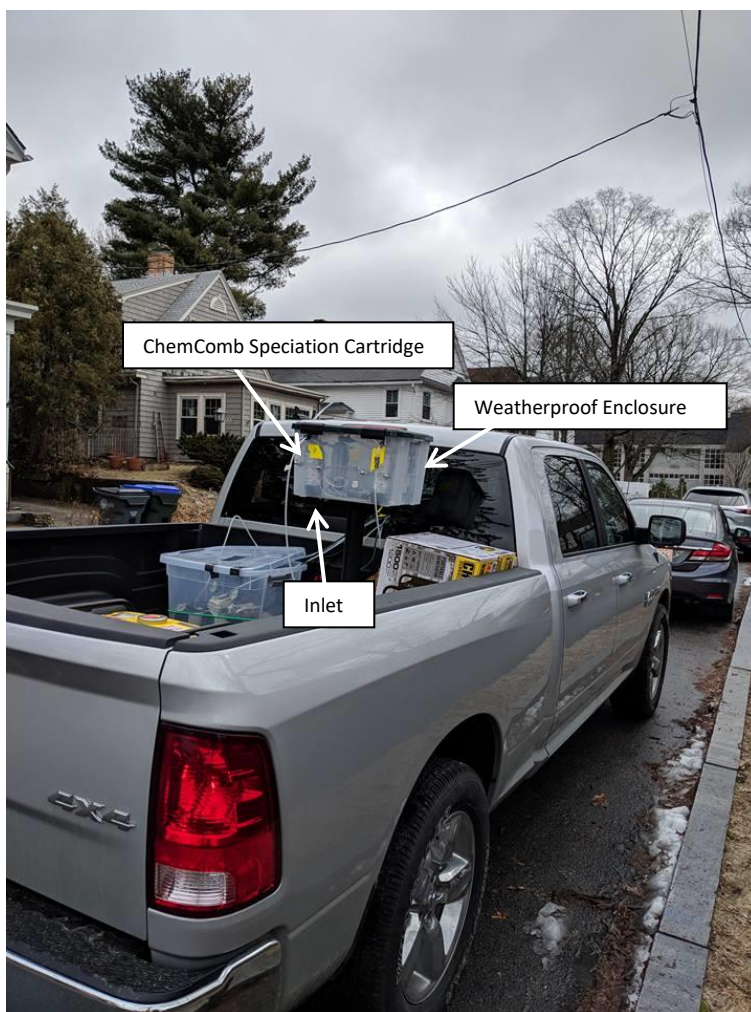

**Figure S3:** Image of the mobile lab for on-road collections of  $\text{NH}_3$  from fresh vehicle traffic plumes in the northeastern US. The collection of  $\text{NH}_3$  was conducted using a ChemComb Speciation Cartridge, which was held in a weatherproof enclosure, and the sampling inlet was directly exposed to ambient air to limit the inlet loss of  $\text{NH}_3$ .

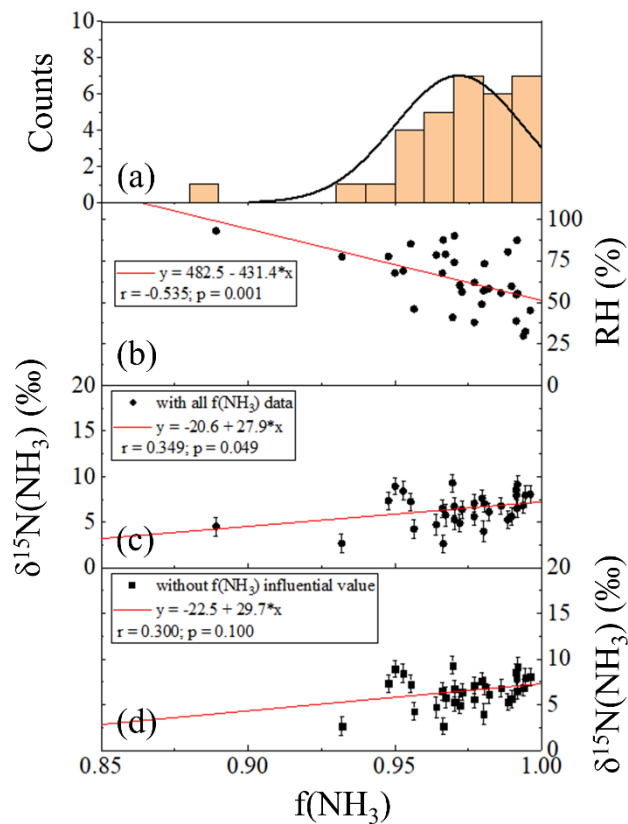

**Figure S4:** The summer near-highway monitoring (Providence, RI, US)  $f(\text{NH}_3)$  data including (a)  $f(\text{NH}_3)$  distribution and linear relations between (b) relative humidity (RH) and  $f(\text{NH}_3)$ , (c)  $\delta^{15}\text{N}(\text{NH}_3)$  and  $f(\text{NH}_3)$  (all data), and (d)  $\delta^{15}\text{N}(\text{NH}_3)$  and  $f(\text{NH}_3)$  (without influential  $f(\text{NH}_3)$  value).

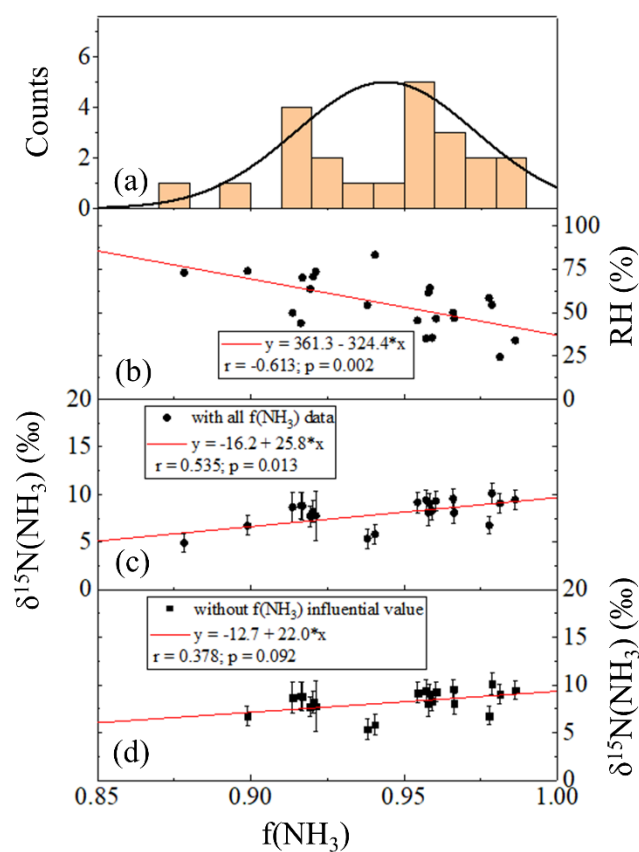

**Figure S5:** The winter near-highway monitoring (Providence, RI, US)  $f(\text{NH}_3)$  data including (a)  $f(\text{NH}_3)$  distribution and linear relations between (b) relative humidity (RH) and  $f(\text{NH}_3)$ , (c)  $\delta^{15}\text{N}(\text{NH}_3)$  and  $f(\text{NH}_3)$  (all data), and (d)  $\delta^{15}\text{N}(\text{NH}_3)$  and  $f(\text{NH}_3)$  (without influential  $f(\text{NH}_3)$  value).

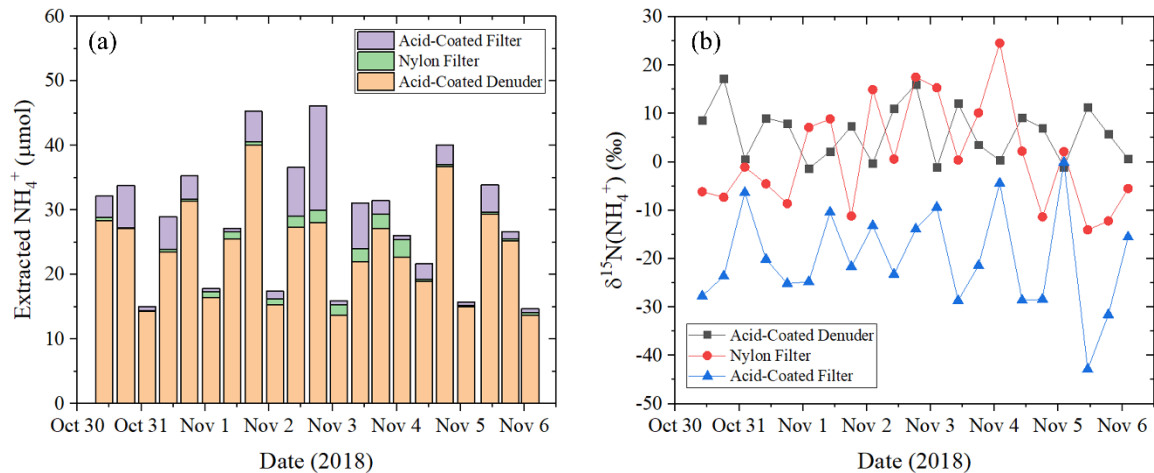

**Figure S6:** Comparison between the extracted  $\text{NH}_4^+$  (a) and the measured  $\delta^{15}\text{N}$  (b) of the different collection media, including the acid-coated denuder, nylon filter, and acid-coated filter for collection conducted in the Shenyang Tunnel.

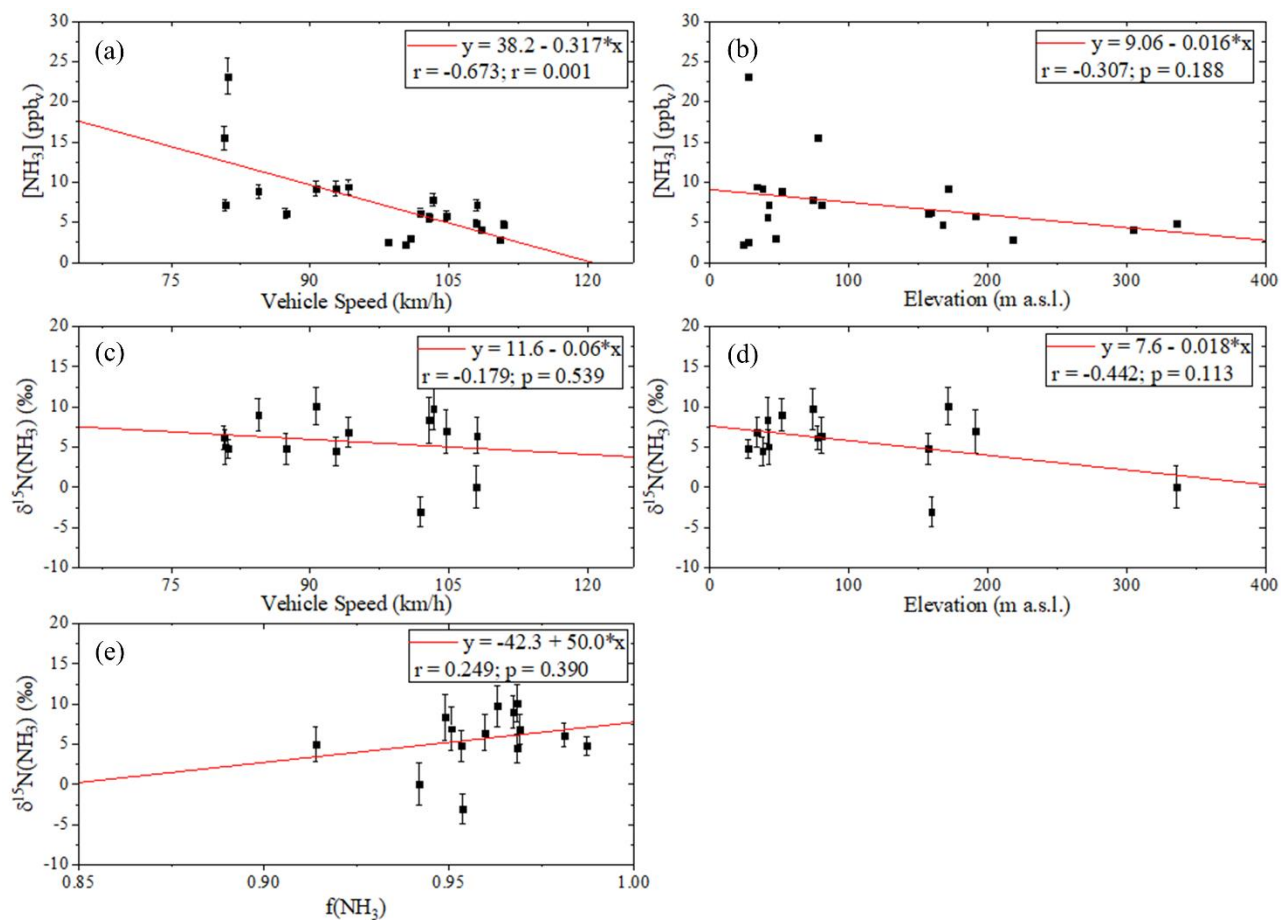

**Figure S7:** Linear relations from mobile on-road measurements in the northeastern US between (a)  $[NH_3]$  and vehicle speed, (b)  $[NH_3]$  and elevation, (c)  $\delta^{15}N(NH_3)$  and vehicle speed, (d)  $\delta^{15}N(NH_3)$  and elevation, and (e)  $\delta^{15}N(NH_3)$  and  $f(NH_3)$ .

**Table S1:** Summary of ISORROPIA modeled of  $\text{NH}_x$  speciation conducted for samples collected in the tunnel from Shenyang, China. Model inputs included  $[\text{NH}_x]$ ,  $[\text{NO}_3^T]$ ,  $[\text{SO}_4^T]$ , relative humidity (RH) and temperature (Temp) and model outputs included  $[\text{NH}_3]$  and  $[\text{pNH}_4^+]$  from which  $f(\text{NH}_3)$  was calculated. All concentrations are reported in units of  $\mu\text{mol}\cdot\text{m}^{-3}$ .

| Average<br>Collection Date | Model Input     |                   |                   |       |             | Model Output    |                    |                  |
|----------------------------|-----------------|-------------------|-------------------|-------|-------------|-----------------|--------------------|------------------|
|                            | $[\text{NH}_x]$ | $[\text{NO}_3^T]$ | $[\text{SO}_4^T]$ | RH(%) | Temp<br>(K) | $[\text{NH}_3]$ | $[\text{pNH}_4^+]$ | $f(\text{NH}_3)$ |
| 10/31/18 18:07             | 7.317           | 0.041             | 0.027             | 39.5  | 293.1       | 7.225           | 0.091              | 0.987            |
| 11/1/18 2:12               | 3.656           | 0.065             | 0.062             | 33.6  | 290.4       | 3.471           | 0.185              | 0.949            |
| 11/1/18 10:12              | 5.775           | 0.157             | 0.083             | 32.2  | 291.0       | 5.455           | 0.320              | 0.945            |
| 11/1/18 18:12              | 9.279           | 0.000             | 0.030             | 31.5  | 292.7       | 9.219           | 0.060              | 0.994            |
| 11/2/18 2:14               | 3.675           | 0.063             | 0.051             | 36.4  | 289.5       | 3.513           | 0.162              | 0.956            |
| 11/2/18 10:14              | 7.545           | 0.324             | 0.099             | 37.4  | 291.6       | 7.026           | 0.519              | 0.931            |
| 11/2/18 18:23              | 9.400           | 0.388             | 0.058             | 37.0  | 294.9       | 8.901           | 0.498              | 0.947            |
| 11/3/18 2:19               | 3.466           | 0.363             | 0.069             | 41.9  | 290.4       | 2.969           | 0.497              | 0.857            |
| 11/3/18 10:19              | 6.231           | 0.381             | 0.081             | 36.7  | 293.1       | 5.693           | 0.537              | 0.914            |
| 11/3/18 18:01              | 7.399           | 0.413             | 0.108             | 40.3  | 294.1       | 6.776           | 0.623              | 0.916            |
| 11/4/18 1:57               | 4.959           | 0.352             | 0.111             | 45.8  | 292.1       | 4.390           | 0.569              | 0.885            |
| 11/4/18 10:22              | 4.496           | 0.034             | 0.046             | 41.9  | 290.9       | 4.373           | 0.122              | 0.973            |
| 11/4/18 18:04              | 9.112           | 0.026             | 0.041             | 44.3  | 290.2       | 9.004           | 0.108              | 0.988            |
| 11/5/18 2:05               | 3.020           | 0.035             | 0.028             | 30.3  | 289.8       | 2.932           | 0.087              | 0.971            |
| 11/5/18 11:02              | 6.150           | 0.047             | 0.035             | 27.8  | 289.6       | 6.034           | 0.116              | 0.981            |
| 11/5/18 18:48              | 7.031           | 0.041             | 0.028             | 24.7  | 289.9       | 6.936           | 0.095              | 0.986            |
| 11/6/18 2:14               | 2.876           | 0.056             | 0.040             | 20.6  | 289.7       | 2.744           | 0.133              | 0.954            |
